# Supplementary material for: Group A Streptococcal M1 Protein Provides Resistance against the Antimicrobial Activity of Histones
Source: PubMed Central journal article supplement (PMC5318940; doi:10.1038/srep43039), 2017-02-21
Supplement: srep43039-s1.pdf [file srep43039-s1.pdf]

## Supplemental Information

### **Group A Streptococcal M1 Protein Provides Resistance against the Antimicrobial Activity of Histones**

Simon Döhrmann<sup>1</sup>, Christopher N. LaRock<sup>1</sup>, Ericka L. Anderson<sup>1</sup>, Jason N. Cole<sup>1</sup>,  
Brinda Ryali<sup>1</sup>, Chelsea Stewart<sup>2</sup>, Poochit Nonejuie<sup>3</sup>, Joe Pogliano<sup>3</sup>, Ross Corriden<sup>1,4</sup>,  
Partho Ghosh<sup>2</sup> and Victor Nizet<sup>\*1,5,6</sup>

#### Contents:

Supplemental Materials and Methods

Figure S1

Figure S2

Figure S3

Figure S4

Table S1

## **Supplemental Materials and Methods**

### **Histone H2A cytotoxicity against human cells**

One day prior to the assay,  $2 \times 10^5$  human epithelia A549 cells (ATCC CCL-185; USA) were seeded in 200  $\mu$ L RPMI + 10 % fetal bovine serum (FBS; Life Technologies) and cultivated at 37 °C, 5 % CO<sub>2</sub>. Prior to the assay, cells were washed once with DPBS. Either  $2 \times 10^5$  neutrophils or A549 cells were seeded in a 96 well-plate in RPMI + 0.2 % BSA. Cytotoxicity was measured after incubating cells with 1, 10, 100 and 500  $\mu$ g/mL histone H2A in 200  $\mu$ L RPMI + 0.2 % BSA for 1 h at 37 °C, 5 % CO<sub>2</sub>. Dead cells were stained with 1.5  $\mu$ M propidium iodide (PI) (Life Technologies) and incubated for 5 min prior to analysis. Cells were imaged via fluorescence microscopy imaging using a Zeiss Observer D1 microscope with 20x objective and cell death was quantified by flow cytometry at FL-2 channel. Flow cytometry data was analyzed using FlowJo v. 8.8.7.

### **M1 protein expression on the GAS cell surface**

M1 protein expression on GAS WT and  $\Delta emm1$  mutant bacteria was analyzed by incubation of bacteria with mouse anti-M1 serum or naïve serum (1:100 dilution) for 30 min followed by goat anti-mouse Alexa 488 (Life Technologies) for analysis of a

total of 50,000 bacteria in FI-1 channel using flow cytometry. For EM, log-phase bacteria were washed twice and fixed with 2 % PFA followed by incubation with mouse anti-M1 antiserum (1:100 dilution). Secondary goat anti-mouse immunogold-labeled antibodies of 10 nm size were used (1:50 dilution). Fixed samples were visualized using a Tecnai G2 Spirit BioTWIN transmission electron microscope. Random images were taken at 13,000 x, 23,000 x and 49,000 x with an Eagle 4 k HS digital camera.

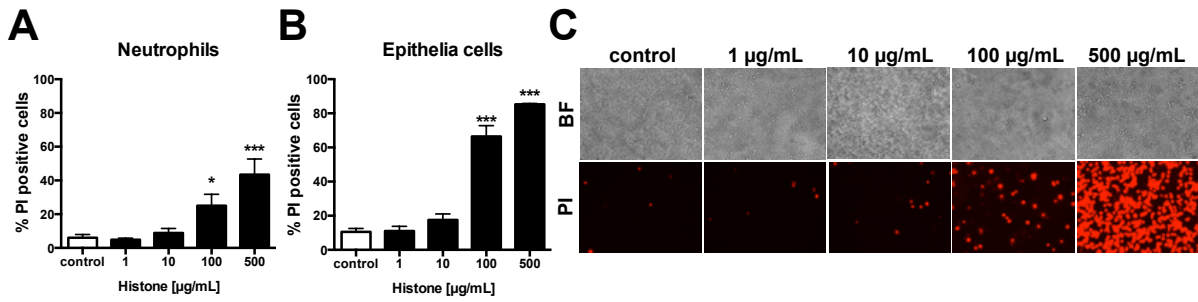

**Figure S1.** Histone-induced cytotoxicity at 1, 10, 100 and 500  $\mu\text{g/mL}$  histone H2A determined by PI against (A) neutrophils and (B) A549 cells quantified using flow cytometry. (C) Visualization of histone-induced cytotoxicity in A549 cells by PI staining with fluorescent microscopy at 20x magnification. Results shown represent average  $\pm$  SEM values and were analyzed by Student's *t*-test (n.s., not significant, \* $P < 0.05$  and \*\*\* $P < 0.001$ ).

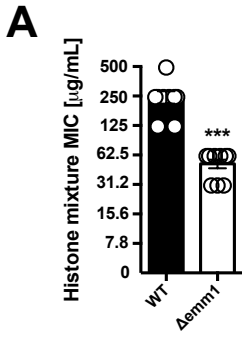

**Figure S2.** (A) MIC assay of GAS WT and  $\Delta\text{emm1}$  mutant against histone mixture.

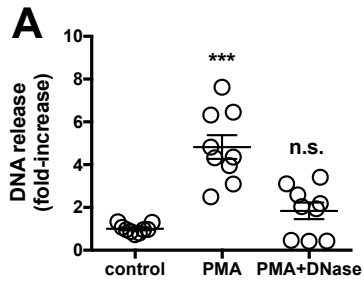

**Figure S3.** (A) Degradation of PMA-induced NETs with 100 U/mL DNase for 30 min after 3.5 h. Result shown represent average  $\pm$  SEM values and were analyzed by Student's *t*-test (n.s., not significant and \*\*\* $P$ <0.001).

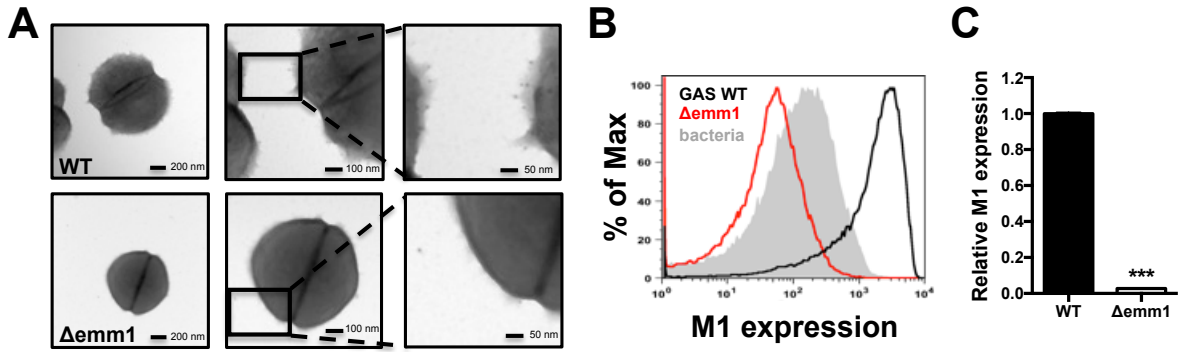

**Figure S4.** (A) M1 protein expression on GAS WT and  $\Delta emm1$  mutant was analyzed by detection of M1 protein on bacterial surface with mouse anti-M1 serum followed by anti-mouse immunogold particles of 10 nm size and visualized by TEM at 11,000 and 23,000 and 49,000x magnification. (B) M1 protein expression on GAS WT and  $\Delta emm1$  mutant was analyzed by flow cytometry and quantified relative to the fluorescent signal for GAS WT. Result shown in (B) represents average  $\pm$  SEM values and was analyzed by Student's *t*-test (\*\* $P < 0.001$ ).

**Supplementary Table 1. CFU counts in antibacterial experiments.** CFU counts were listed in comparison to % survival of bacterial killing assay.

| Figure                        | sample ID         | mean surviving CFU    | SD          | % survival vs. inoculum |
|-------------------------------|-------------------|-----------------------|-------------|-------------------------|
| 2D                            | GAS               | 4570.666667           | 1362.90314  | 90.20351                |
|                               | MRSA              | 1836.605682           | 360.4460788 | 37.47276333             |
| 3E                            | GAS WT 1 h        | 1946666.667           | 485669.6408 | 94.35071333             |
|                               | GAS WT 2 h        | 1575555.556           | 429537.8654 | 81.14296                |
|                               | GAS WT 3 h        | 1391111.111           | 492682.5663 | 63.55810556             |
|                               | $\Delta$ emm1 1 h | 1367777.778           | 1081316.071 | 28.72291667             |
|                               | $\Delta$ emm1 2 h | 505555.5556           | 302411.6032 | 11.95432444             |
|                               | $\Delta$ emm1 3 h | 198888.8889           | 135595.3949 | 9.511582222             |
|                               | 3F                | GAS WT 7.8 $\mu$ g/mL | 2377777.778 | 668539.0373             |
| GAS WT 15.6 $\mu$ g/mL        |                   | 2466666.667           | 482182.538  | 100                     |
| GAS WT 32.1 $\mu$ g/mL        |                   | 2422222.222           | 399304.9517 | 100                     |
| GAS WT 62.5 $\mu$ g/mL        |                   | 2188888.889           | 365528.5367 | 99.29676222             |
| GAS WT 125 $\mu$ g/mL         |                   | 1522222.222           | 705137.8904 | 75.93925667             |
| GAS WT 250 $\mu$ g/mL         |                   | 1397777.778           | 470817.8464 | 73.32338444             |
| GAS WT 500 $\mu$ g/mL         |                   | 1108888.889           | 305468.6745 | 70.73791444             |
| GAS WT 1000 $\mu$ g/mL        |                   | 1181111.111           | 483953.625  | 61.77463                |
| $\Delta$ emm1 7.8 $\mu$ g/mL  |                   | 1644444.444           | 519882.4653 | 100                     |
| $\Delta$ emm1 15.6 $\mu$ g/mL |                   | 1628888.889           | 705344.6754 | 99.17459778             |
| $\Delta$ emm1 31.2 $\mu$ g/mL |                   | 1677777.778           | 777460.2526 | 94.60317444             |
| $\Delta$ emm1 62.5 $\mu$ g/mL |                   | 881111.1111           | 669242.9388 | 87.16276                |
| $\Delta$ emm1 125 $\mu$ g/mL  |                   | 520000                | 322529.0685 | 64.54842111             |
| $\Delta$ emm1 250 $\mu$ g/mL  |                   | 444444.4444           | 115337.6685 | 34.13562444             |
| $\Delta$ emm1 500 $\mu$ g/mL  |                   | 391111.1111           | 77208.23215 | 30.32377111             |
| $\Delta$ emm1 1000 $\mu$ g/mL |                   | 190000                | 143961.8005 | 16.24008556             |
| 4A                            |                   | GAS WT                | 34044.44444 | 7365.987902             |
|                               | $\Delta$ emm1     | 18395.43829           | 2733.455904 | 47.96854111             |
|                               | $\Delta$ emm1+M1  | 28130.2015            | 5991.37245  | 74.29271889             |
| 4B                            | GAS WT            | 33866.66667           | 7515.317691 | 76.83277333             |
|                               | $\Delta$ emm1     | 24117.11998           | 5817.181713 | 67.68311222             |
|                               | $\Delta$ emm1+M1  | 39563.12918           | 18553.77091 | 113.9521                |
| 4C                            | GAS WT            | 30400                 | 4270.831301 | 85.88306333             |
|                               | $\Delta$ emm1     | 26523.78092           | 6099.130126 | 75.33934                |
|                               | $\Delta$ emm1+M1  | 42368.82239           | 11815.51156 | 115.68812               |
| 4D                            | GAS WT            | 59644.44444           | 27788.08698 | 95.46187778             |
|                               | GAS WT+anti-M1    | 38577.77778           | 17402.4264  | 62.32847                |
